# Supplementary material
Source: MDPI journal article supplement (https://www.mdpi.com/2673-8007/4/1/26)
Supplement: s1 [file s1]

## Supplementary Figures and Tables

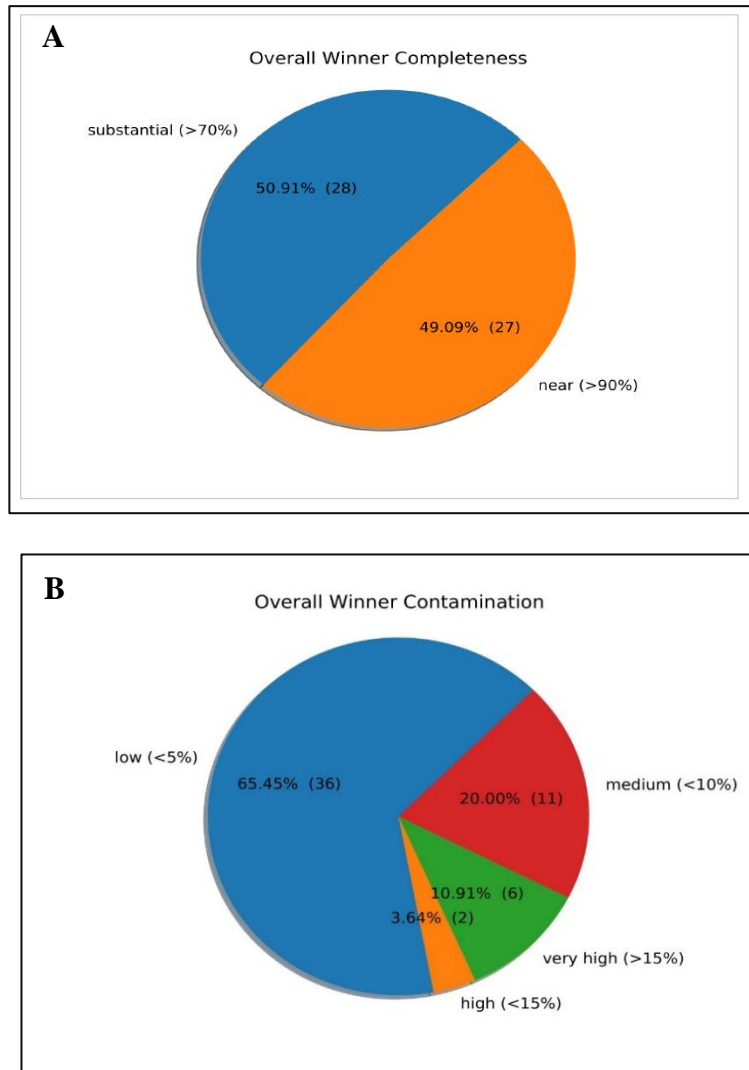

**Figure S1.** Overall winner MAGs produced from the SRS soils. About 254 individual bins were recovered from the SRS soil samples; however, 49 MAGs were selected based on the >75 completion (A) and < 25 contamination level (B).

**Table S1** Winning Genome information with Marker lineage reconstructed after dRep analysis on the MAG generated from SRS samples with varying uranium concentrations collected at different seasons. 55 MAGs with completeness >75% and contamination <25%, accounting for 21.6% of the total MAGs were reconstructed.

| genome                                                 | Marker lineage              | completeness | contamination | strain_heterogeneity | length  |
|--------------------------------------------------------|-----------------------------|--------------|---------------|----------------------|---------|
| soil-summer-high-uranium-results-MEGAHIT-group-0.13.fa | p__Actinobacteria (UID1454) | 95.73        | 1.42          | 33.33                | 3083233 |
| soil-summer-high-uranium-results-MEGAHIT-group-0.14.fa | o__Rhizobiales (UID3447)    | 86.38        | 2.74          | 80                   | 2682434 |
| soil-summer-high-uranium-results-MEGAHIT-group-0.17.fa | k__Bacteria (UID1452)       | 89.81        | 3.81          | 0                    | 2330232 |
| soil-summer-low-uranium-results-MEGAHIT-group-0.11.fa  | k__Bacteria (UID3187)       | 93.16        | 11.59         | 20.83                | 5392018 |
| soil-summer-low-uranium-results-MEGAHIT-group-0.12.fa  | k__Bacteria (UID1452)       | 92.75        | 2.42          | 50                   | 3127523 |
| soil-summer-low-uranium-results-MEGAHIT-group-0.15.fa  | k__Archaea (UID2)           | 75.49        | 0.97          | 0                    | 2104794 |
| soil-summer-low-uranium-results-MEGAHIT-group-0.21.fa  | p__Actinobacteria (UID1454) | 94.44        | 3.16          | 14.29                | 2333606 |
| soil-summer-low-uranium-results-MEGAHIT-group-0.24.fa  | p__Euryarchaeota (UID3)     | 99.2         | 1.6           | 0                    | 2661188 |
| soil-summer-low-uranium-results-MEGAHIT-group-0.3.fa   | p__Euryarchaeota (UID49)    | 98.53        | 2.61          | 0                    | 2895156 |
| soil-summer-low-uranium-results-MEGAHIT-group-0.5.fa   | o__Rhizobiales (UID3447)    | 75.79        | 3.31          | 50                   | 2771185 |
| soil-summer-low-uranium-results-MEGAHIT-group-0.6.fa   | k__Archaea (UID2)           | 91.75        | 2.91          | 0                    | 2256961 |

|                                                          |                                  |       |       |       |         |
|----------------------------------------------------------|----------------------------------|-------|-------|-------|---------|
| soil-summer-medium-uranium-results-MEGAHIT-group-0.10.fa | f__Micrococcaceae (UID1631)      | 78.77 | 1.8   | 100   | 3504281 |
| soil-winter-high-uranium-results-MEGAHIT-group-0.17.fa   | c__Betaproteobacteria (UID3971)  | 95.79 | 3.48  | 36.36 | 4120679 |
| soil-winter-high-uranium-results-MEGAHIT-group-0.19.fa   | k__Bacteria (UID3187)            | 78.13 | 3.99  | 0     | 4960548 |
| soil-winter-high-uranium-results-MEGAHIT-group-0.23.fa   | k__Bacteria (UID3187)            | 91.88 | 5.27  | 12.5  | 8053684 |
| soil-winter-high-uranium-results-MEGAHIT-group-0.26.fa   | k__Bacteria (UID3187)            | 83.12 | 3.42  | 0     | 4773232 |
| soil-winter-high-uranium-results-MEGAHIT-group-0.3.fa    | k__Bacteria (UID3187)            | 81.99 | 18.66 | 11.11 | 6349288 |
| soil-winter-high-uranium-results-MEGAHIT-group-0.33.fa   | p__Bacteroidetes (UID2591)       | 94.88 | 2.64  | 37.5  | 3768066 |
| soil-winter-high-uranium-results-MEGAHIT-group-0.35.fa   | k__Bacteria (UID1452)            | 91.36 | 4.63  | 16.67 | 2805076 |
| soil-winter-high-uranium-results-MEGAHIT-group-0.36.fa   | c__Alphaproteobacteria (UID3305) | 79.17 | 3.39  | 71.43 | 2336408 |
| soil-winter-high-uranium-results-MEGAHIT-group-0.40.fa   | c__Gammaproteobacteria (UID4202) | 92.77 | 3.83  | 23.81 | 3661217 |
| soil-winter-high-uranium-results-MEGAHIT-group-0.5.fa    | c__Alphaproteobacteria (UID3305) | 96.3  | 3.07  | 30    | 4186502 |
| soil-winter-high-uranium-results-MEGAHIT-group-0.51.fa   | k__Bacteria (UID1452)            | 91.67 | 1.57  | 0     | 4442876 |
| soil-winter-high-uranium-results-MEGAHIT-group-0.52.fa   | k__Bacteria (UID3187)            | 90.17 | 3.47  | 16.67 | 4854587 |

|                                                        |                                  |       |       |       |         |
|--------------------------------------------------------|----------------------------------|-------|-------|-------|---------|
| soil-winter-high-uranium-results-MEGAHIT-group-0.55.fa | k__Bacteria (UID3187)            | 82.92 | 5.91  | 12.5  | 1912464 |
| soil-winter-high-uranium-results-MEGAHIT-group-0.61.fa | k__Bacteria (UID3187)            | 92.07 | 9.96  | 31.82 | 5211487 |
| soil-winter-high-uranium-results-MEGAHIT-group-0.63.fa | k__Bacteria (UID1452)            | 77.2  | 1.85  | 33.33 | 2663546 |
| soil-winter-high-uranium-results-MEGAHIT-group-0.7.fa  | k__Bacteria (UID1452)            | 88.99 | 0.92  | 0     | 2628606 |
| soil-winter-low-uranium-results-MEGAHIT-group-0.12.fa  | k__Bacteria (UID3187)            | 97.15 | 2.56  | 0     | 6711185 |
| soil-winter-low-uranium-results-MEGAHIT-group-0.3.fa   | k__Bacteria (UID203)             | 84.72 | 3.67  | 0     | 7524572 |
| soil-winter-low-uranium-results-MEGAHIT-group-0.32.fa  | k__Bacteria (UID203)             | 81.82 | 21.29 | 51.35 | 3265507 |
| soil-winter-low-uranium-results-MEGAHIT-group-0.33.fa  | k__Bacteria (UID2495)            | 85.03 | 24.28 | 44.44 | 4172680 |
| soil-winter-low-uranium-results-MEGAHIT-group-0.38.fa  | k__Bacteria (UID203)             | 91.23 | 5.5   | 75    | 5025612 |
| soil-winter-low-uranium-results-MEGAHIT-group-0.47.fa  | c__Gammaproteobacteria (UID4202) | 94.57 | 8.5   | 20    | 3319549 |
| soil-winter-low-uranium-results-MEGAHIT-group-0.53.fa  | c__Alphaproteobacteria (UID3305) | 79.75 | 2.2   | 50    | 3748426 |
| soil-winter-low-uranium-results-MEGAHIT-group-0.55.fa  | p__Euryarchaeota (UID3)          | 94.5  | 15.59 | 17.65 | 2867787 |
| soil-winter-low-uranium-results-MEGAHIT-group-0.56.fa  | k__Bacteria (UID1452)            | 97.73 | 9.05  | 7.69  | 4126511 |

|                                                          |                       |       |       |       |         |
|----------------------------------------------------------|-----------------------|-------|-------|-------|---------|
| soil-winter-low-uranium-results-MEGAHIT-group-0.8.fa     | k__Archaea (UID2)     | 75.24 | 0.49  | 0     | 1042614 |
| soil-winter-low-uranium-results-MEGAHIT-group-0.9.fa     | k__Bacteria (UID3187) | 94.02 | 6.41  | 0     | 8036188 |
| soil-winter-medium-uranium-results-MEGAHIT-group-0.1.fa  | k__Bacteria (UID2570) | 88.4  | 1.09  | 0     | 2532248 |
| soil-winter-medium-uranium-results-MEGAHIT-group-0.15.fa | k__Bacteria (UID2495) | 84.52 | 4.76  | 0     | 2537901 |
| soil-winter-medium-uranium-results-MEGAHIT-group-0.2.fa  | k__Bacteria (UID3187) | 95.22 | 6.09  | 0     | 6095384 |
| soil-winter-medium-uranium-results-MEGAHIT-group-0.25.fa | k__Bacteria (UID3187) | 78.85 | 5.98  | 25    | 4805942 |
| soil-winter-medium-uranium-results-MEGAHIT-group-0.26.fa | k__Bacteria (UID203)  | 81.03 | 5.17  | 25    | 5115929 |
| soil-winter-medium-uranium-results-MEGAHIT-group-0.27.fa | k__Bacteria (UID3187) | 77.22 | 7.29  | 13.33 | 5487845 |
| soil-winter-medium-uranium-results-MEGAHIT-group-0.29.fa | k__Bacteria (UID3187) | 83.96 | 3.18  | 50    | 2404073 |
| soil-winter-medium-uranium-results-MEGAHIT-group-0.3.fa  | k__Bacteria (UID1452) | 91.09 | 3.47  | 75    | 2893218 |
| soil-winter-medium-uranium-results-MEGAHIT-group-0.36.fa | k__Archaea (UID2)     | 79.61 | 2.75  | 75    | 958102  |
| soil-winter-medium-uranium-results-MEGAHIT-group-0.37.fa | k__Bacteria (UID3187) | 94.87 | 4.7   | 16.67 | 6098353 |
| soil-winter-medium-uranium-results-MEGAHIT-group-0.39.fa | k__Bacteria (UID1452) | 91    | 1.39  | 0     | 2674289 |
| soil-winter-medium-uranium-results-                      | k__Bacteria (UID203)  | 86.99 | 20.82 | 16    | 3330858 |

|                                                          |                                 |       |       |       |         |
|----------------------------------------------------------|---------------------------------|-------|-------|-------|---------|
| MEGAHIT-group-0.40.fa                                    |                                 |       |       |       |         |
| soil-winter-medium-uranium-results-MEGAHIT-group-0.41.fa | p__Euryarchaeota (UID3)         | 89.49 | 1.66  | 33.33 | 1648859 |
| soil-winter-medium-uranium-results-MEGAHIT-group-0.44.fa | c__Betaproteobacteria (UID3959) | 76.13 | 2.65  | 27.27 | 3859939 |
| soil-winter-medium-uranium-results-MEGAHIT-group-0.46.fa | k__Bacteria (UID3187)           | 92.36 | 18.8  | 25    | 5449853 |
| soil-winter-medium-uranium-results-MEGAHIT-group-0.62.fa | k__Bacteria (UID3187)           | 82.28 | 12.89 | 29.17 | 8189196 |

**Table S2.** Analysis performed on the MAGs of *Arthrobacter oryzae* using the KBase bioinformatics pipeline.

| <b>Function Role</b>                                  | <b>Gene count</b> | <b>Subsystem Name</b>                                                     | <b>Subsystem Class</b>                          |
|-------------------------------------------------------|-------------------|---------------------------------------------------------------------------|-------------------------------------------------|
| ATP-dependent DNA helicase RecQ                       | 6                 | DNA repair, bacterial RecFOR pathway                                      | DNA processing                                  |
| ATP-dependent DNA helicase SCO5183                    | 2                 | DNA repair, bacterial RecBCD pathway                                      | DNA processing                                  |
| ATP-dependent DNA helicase SCO5184                    | 4                 | DNA repair, bacterial RecBCD pathway                                      | DNA processing                                  |
| DNA integrity scanning protein DisA                   | 2                 | DNA repair, bacterial                                                     | DNA processing                                  |
| DNA polymerase like protein MT3142                    | 4                 | DNA repair, bacterial                                                     | DNA processing                                  |
| DNA recombination and repair protein RecF             | 2                 | DNA repair, bacterial RecFOR pathway                                      | DNA processing                                  |
| DNA recombination and repair protein RecO             | 2                 | DNA repair, bacterial RecFOR pathway                                      | DNA processing                                  |
| DNA recombination protein RmuC                        | 2                 | DNA repair, bacterial                                                     | DNA processing                                  |
| DNA repair helicase                                   | 2                 | Potential DNA repair cluster                                              | DNA processing                                  |
| DNA repair protein RadA                               | 2                 | DNA repair, bacterial                                                     | DNA processing                                  |
| DNA repair protein RecN                               | 2                 | DNA repair, bacterial rRNA modification related cluster including tlyA    | DNA processing                                  |
| Endonuclease VIII                                     | 4                 | DNA repair base excision                                                  | DNA processing                                  |
| Error-prone repair protein UmuD                       | 2                 | DNA repair, bacterial UmuCD system                                        | DNA processing                                  |
| Excinuclease ABC subunit A                            | 4                 | DNA repair, UvrABC system                                                 | DNA processing                                  |
| Excinuclease ABC subunit A parlog of unknown function | 6                 | DNA repair, UvrABC system                                                 | DNA processing                                  |
| Excinuclease ABC subunit B                            | 4                 | DNA repair, UvrABC system                                                 | DNA processing                                  |
| Excinuclease ABC subunit C                            | 2                 | BarA-UrvY(SirA) two component regulatory system DNA repair, uvrABC system | Regulation and Cell signaling<br>DNA processing |

**Table S3.** Number and types of specialized genes found in the MAG of *Arthrobacter oryzae*.

|                       | Source    | Genes |
|-----------------------|-----------|-------|
| Antibiotic Resistance | CARD      | 2     |
| Antibiotic Resistance | PATRIC    | 32    |
| Drug Target           | DrugBank  | 6     |
| Drug Target           | TTF       | 2     |
| Transporter           | TCDB      | 1     |
| Virulence Factor      | PATRIC_VF | 4     |
| Virulence Factor      | Victors   | 1     |
